# Supplementary material
Source: HighWire-hosted journal article supplement (https://jcp.bmj.com/content/77/12/829)
Supplement: inline-supplementary-material-1 [file inline-supplementary-material-1.pdf]

Supplementary Table 1. Clinicopathological features of patients with NPC (491 cases)

| Patients features                   | No. of patients (%) |
|-------------------------------------|---------------------|
| NPC patients                        |                     |
| Gender                              |                     |
| Male                                | 356 (71.34)         |
| Female                              | 143 (28.66)         |
| Age                                 |                     |
| ≤45                                 | 143 (29.12)         |
| >45                                 | 348 (70.88)         |
| Clinical stages                     |                     |
| I                                   | 5 (1.01)            |
| II                                  | 60 (12.22)          |
| III                                 | 239 (48.68)         |
| IV                                  | 187 (38.09)         |
| T stage                             |                     |
| T1 and T2                           | 215 (43.79)         |
| T3 and T4                           | 276(56.21)          |
| N stage                             |                     |
| N0                                  | 58 (11.81)          |
| N1/2/3                              | 433 (88.19)         |
| M stage                             |                     |
| M0                                  | 454 (92.46)         |
| M1                                  | 37 (7.54)           |
| Noncancerous nasopharyngeal tissues |                     |
| Gender                              |                     |
| Male                                | 35 (70.0)           |
| Female                              | 15 (30.0)           |
| Age                                 |                     |
| ≤45                                 | 16 (32.0)           |
| >45                                 | 34 (68.0)           |
