# Supplementary material
Source: HighWire-hosted journal article supplement (https://jcp.bmj.com/content/77/12/829)

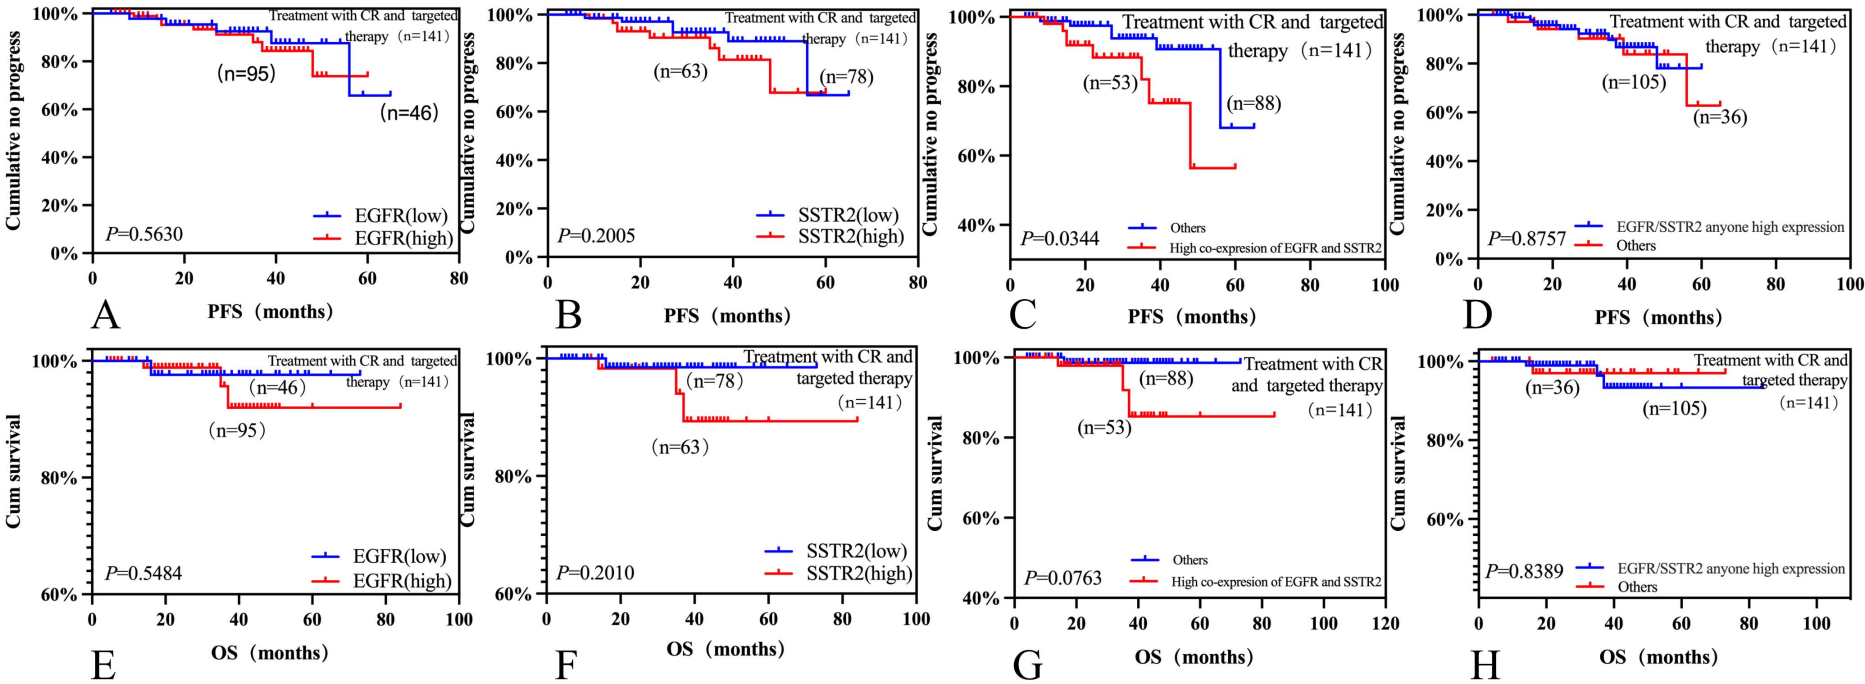

Supplementary Figure 1, Y Xu et al

Supplement: inline-supplementary-material-4 [file inline-supplementary-material-4.pdf]
